# Supplementary material for: Contamination by Trace Elements and Oxidative Stress in the Skeletal Muscle of Scyliorhinus canicula from the Central Tyrrhenian Sea
Source: MDPI journal article supplement (doi:10.3390/antiox12020524), 2023-02-19
Supplement: s1 [file s1]

**Table S1.** Biological and biometric data of the 24 specimens of *S. canicula* enrolled for the present study. All individuals were sexually mature.

| Sample code | Sex | Weight (g) | Length (cm) |
|-------------|-----|------------|-------------|
| SCI17004    | F   | 154        | 33          |
| SCI18040    | F   | 200        | 40          |
| SCP18054    | F   | 185        | 42          |
| SCI18039    | F   | 180        | 38          |
| SCI17007    | M   | 317.5      | 42          |
| SCE17024    | M   | 160        | 36          |
| SCE17025    | M   | 175        | 41          |
| SCI18029    | F   | 245        | 44          |
| SCI17005    | F   | 263        | 39          |
| SCI17010    | F   | 199.6      | 35          |
| SCI18034    | M   | 270        | 43          |
| SCP18056    | F   | 175        | 39.5        |
| SCP18053    | F   | 170        | 40          |
| SCE17023    | F   | 135        | 37          |
| SCP18052    | M   | 255        | 47          |
| SCP18055    | F   | 160        | 39          |
| SCP18058    | M   | 140        | 39          |
| SCI17019    | F   | 317.5      | 40          |
| SCP18057    | F   | 165        | 40          |
| SCI18030    | F   | 195        | 40          |
| SCP18060    | F   | 180        | 41.5        |
| SCP18051    | F   | 205        | 42          |
| SCP18059    | F   | 155        | 39          |
| SCI18036    | F   | 200        | 37.5        |
